# Supplementary material for: Cryo-electron tomography provides topological insights into mutant huntingtin exon 1 and polyQ aggregates
Source: PubMed Central journal article supplement (PMC8266869; doi:10.1038/s42003-021-02360-2), 2021-07-08
Supplement: 42003_2021_2360_MOESM3_ESM.pdf [file 42003_2021_2360_MOESM3_ESM.pdf]

## **Description of Additional Supplementary Files**

**File name:** Supplementary Data 1

**Description:** Excel file containing the raw data used to generate the plots in Supplementary Figure 1b, showing ThioflavinT aggregation reaction of GST-mEx1-Q51 including no-AcTEV control (no aggregation) and three technical replicates with AcTEV added (aggregation reaction).
